# Supplementary material for: Review of the Geological Strength Index (GSI) as an Empirical Classification and Rock Mass Property Estimation Tool: Origination, Modifications, Applications, and Limitations
Source: Hindawi journal article supplement (doi:10.1155/2020/6471837), 2020-01-01
Supplement: f1 [file 6471837.f1.docx]

Hoek *et al.,* in 2005, [66] incorporated weak, heterogeneous rock masses and lithological variability of a rock mass. Hoek *et al.,* developed two charts for confined and fissile molaissic rock masses for tunnels and surface excavations, as presented in Figures 1A and 1B, respectively.


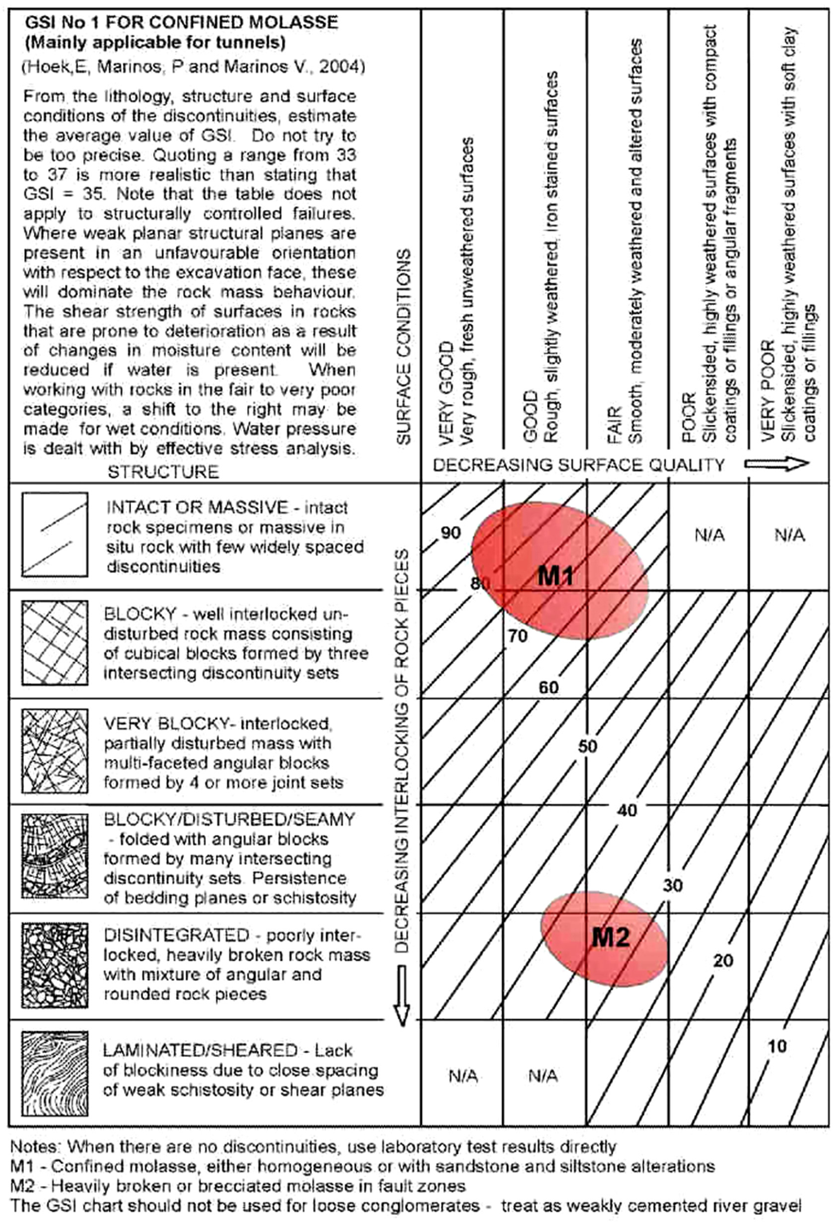

 A


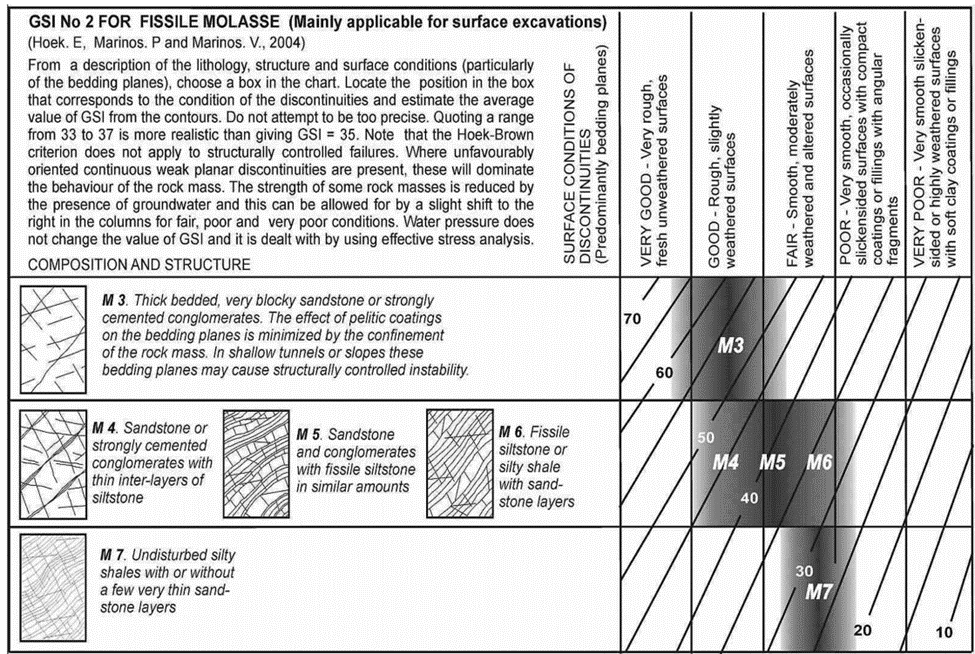


B

Figure 1: GSI charts for confined and fissile molaissic rock masses for tunnels and surface excavations respectively [66]

Hoek *et al*., in 2013, inserted scales at the x-axis and y-axis represented by A and B respectively in GSI chart developed by Hoek and Marinos 2000. Scale A is representing the surface quality of rock mass, having a range from 0 to 45 divided into 5 divisions at an interval of 9. Scale B is representing block interlocking and structure domains of the rock mass, having a range from 0 to 50 divided into 5 divisions at an interval of 10 [13]. The details of the scale are presented in Figure 2.


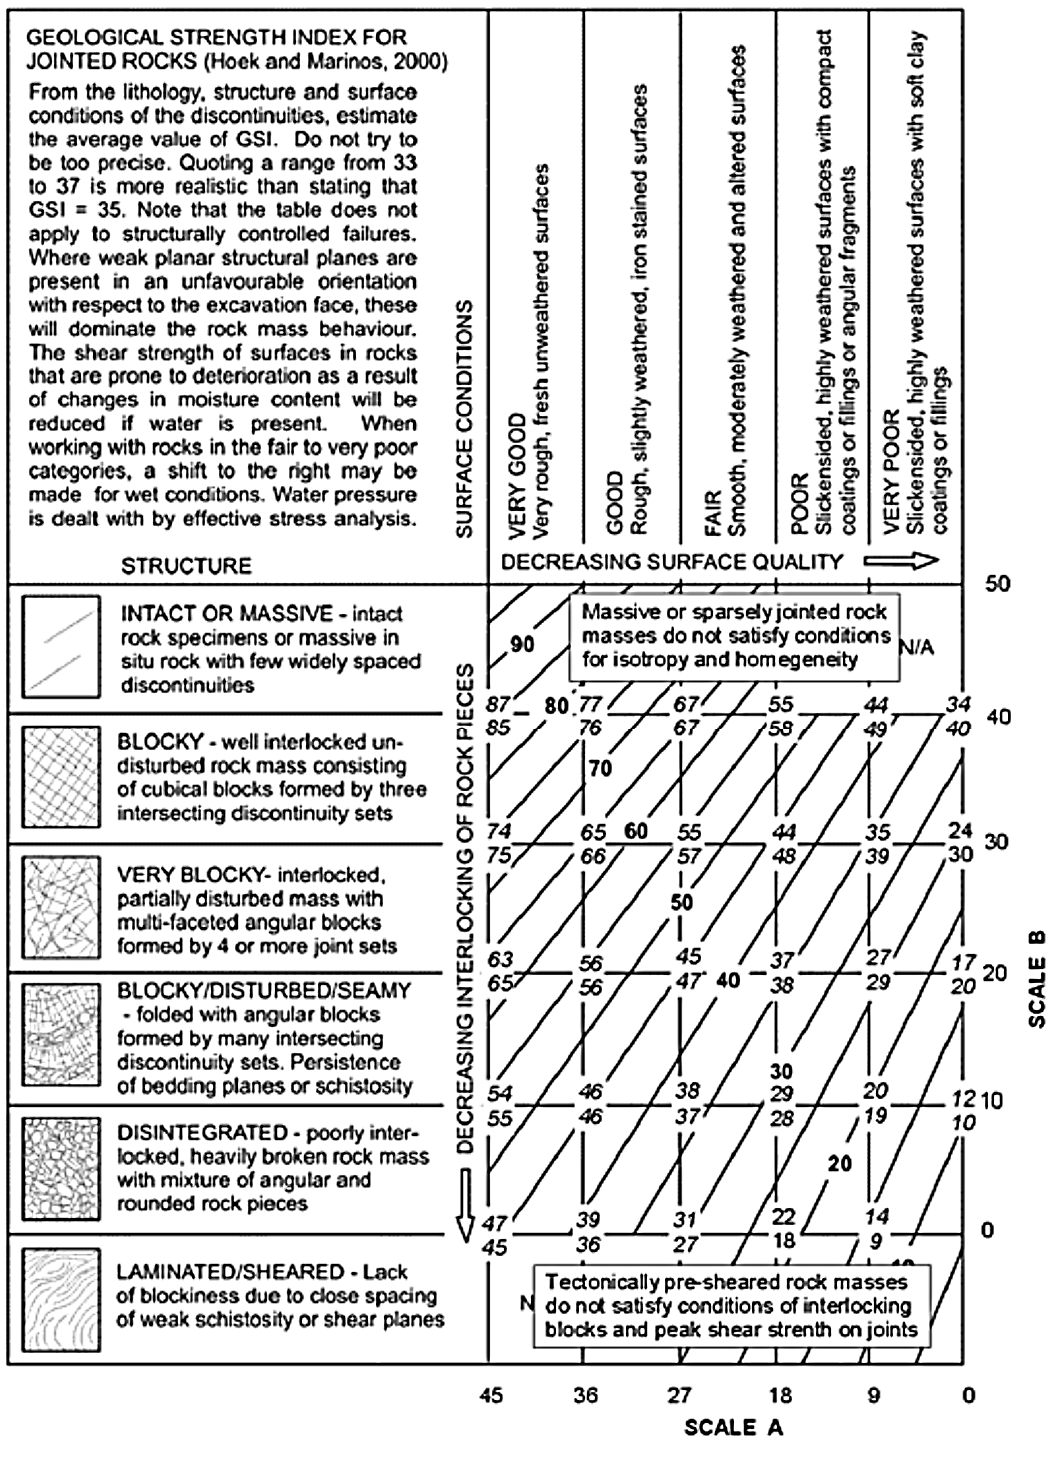


Figure 2: Scale A and B inserted at x and y-axis of GSI chart [13]
